# Supplementary material for: Necroptosis-driving genes RIPK1, RIPK3 and MLKL-p are associated with intratumoral CD3+ and CD8+ T cell density and predict prognosis in hepatocellular carcinoma
Source: HighWire-hosted journal article supplement (doi:10.1136/jitc-2021-004031), 2022-03-01
Supplement: jitc-2021-004031supp002_data_supplement.xlsx [file jitc-2021-004031supp002_data_supplement.xlsx]

## Sheet: Consensus_CD8_Tcell_TCGA_LIHC
Cell_Type	TIMER_2.0	CIBERSORT_absolute_score	xCell	Consensus_Score
TCGA-2V-A95S-01	0.425413	0.233555	0.189572	11.6667
TCGA-2Y-A9GS-01	0.187655	0.0112527	0	255.333
TCGA-2Y-A9GT-01	0.294697	0.209127	0.156395	22
TCGA-2Y-A9GU-01	0.0949757	0.0331115	0.00665568	217
TCGA-2Y-A9GV-01	0.16158	0.0232655	0.0123858	172
TCGA-2Y-A9GW-01	0.14664	0.00952726	0	295.333
TCGA-2Y-A9GX-01	0.324024	0.133419	0.0405955	40.6667
TCGA-2Y-A9GY-01	0.364169	0.185419	0.131344	21
TCGA-2Y-A9GZ-01	0.155665	0	0	315
TCGA-2Y-A9H0-01	0.219977	0.152429	0.0209428	61.3333
TCGA-2Y-A9H1-01	0.131655	0.0337002	0.0603859	159.333
TCGA-2Y-A9H2-01	0.0468841	0.0792283	0	264.333
TCGA-2Y-A9H3-01	0.110854	0.0721717	0.100598	141
TCGA-2Y-A9H4-01	0.181255	0.024246	0.0189544	142.667
TCGA-2Y-A9H5-01	0.15187	0.0472245	0.000198366	186.667
TCGA-2Y-A9H6-01	0.113482	0.053801	0.0208242	167.333
TCGA-2Y-A9H7-01	0.154306	0.0228014	0.00398077	200.333
TCGA-2Y-A9H8-01	0.122716	0.0958477	0.0430236	136
TCGA-2Y-A9H9-01	0.167689	0.0340881	0.0156322	142.333
TCGA-2Y-A9HA-01	0.149333	0.00190964	0	308.667
TCGA-2Y-A9HB-01	0.216195	0.105464	0.0850918	49.3333
TCGA-3K-AAZ8-01	0.100269	0.0418364	0.0333628	176.667
TCGA-4R-AA8I-01	0.180525	0.0117556	0.00212723	204.667
TCGA-5C-A9VG-01	0.1143	0.00818368	0.00341267	266
TCGA-5C-A9VH-01	0.136977	0.0476362	1.88717e-19	214.333
TCGA-5C-AAPD-01	0.239406	0.151309	0.0192207	59
TCGA-5R-AA1C-01	0.189396	0.0339757	0.0345211	110
TCGA-5R-AA1D-01	0.240449	0.0295289	0.00735899	121.333
TCGA-5R-AAAM-01	0.25287	0.0371936	0	181
TCGA-BC-4072-01	0.286939	0.182318	0.0644639	37
TCGA-BC-4073-01	0.502312	0.202861	0.0420309	29.6667
TCGA-BC-A10Q-01	0.258184	0.0241208	3.7468e-19	167
TCGA-BC-A10R-01	0.104759	0.0192969	2.08444e-19	278.333
TCGA-BC-A10S-01	0.231534	0.0280444	0.00506502	134.333
TCGA-BC-A10T-01	0.208253	0.0457618	0	186
TCGA-BC-A10U-01	0.15678	0.0315936	0.000577334	192.333
TCGA-BC-A10W-01	0.204035	0.000150179	0	264.333
TCGA-BC-A10X-01	0.230343	0.0327748	0	190.667
TCGA-BC-A10Y-01	0.199364	0.0423367	0.0033488	137.333
TCGA-BC-A10Z-01	0.133778	0.00670151	4.50809e-19	279.333
TCGA-BC-A110-01	0.227293	0.0189999	5.97268e-18	176
TCGA-BC-A112-01	0.112726	0	8.43727e-19	313.667
TCGA-BC-A216-01	0.313446	0.303967	0.0725681	25.3333
TCGA-BC-A217-01	0.203216	0.0756035	0	174.333
TCGA-BC-A3KF-01	0.163491	0.0169478	0.0031149	204.667
TCGA-BC-A3KG-01	0.177721	0	0.00449987	232.667
TCGA-BC-A5W4-01	0.116896	0.00611156	4.46358e-19	291.333
TCGA-BC-A69H-01	0.0719489	0.0209834	0	312.667
TCGA-BC-A69I-01	0.158826	0.0292025	1.15854e-19	214
TCGA-BC-A8YO-01	0.311692	0.203349	0.0689816	31
TCGA-BD-A2L6-01	0.141531	0.0315064	0.000558899	210.667
TCGA-BD-A3EP-01	0.192383	0.0879288	0.0361386	78.3333
TCGA-BD-A3ER-01	0.146751	0.00848689	6.27699e-20	270
TCGA-BW-A5NO-01	0.183146	0.0277722	0	225.333
TCGA-BW-A5NP-01	0.111909	0.00051489	0	341
TCGA-BW-A5NQ-01	0.388799	0.210848	0.123907	18.3333
TCGA-CC-5258-01	0.201404	0.0067619	0.0276251	157.667
TCGA-CC-5259-01	0.107436	0.0113459	0.0178965	233.333
TCGA-CC-5260-01	0.351354	0.124076	0.000184361	98.3333
TCGA-CC-5261-01	0.21385	0.140252	0.0141659	75.3333
TCGA-CC-5262-01	0.235195	0.0814439	0.000903895	111
TCGA-CC-5263-01	0.186681	0	0	285
TCGA-CC-5264-01	0.189761	0.0434337	0	197.333
TCGA-CC-A123-01	0.134962	0.0131859	0.000520122	254
TCGA-CC-A1HT-01	0.433674	0.262327	0.0608385	24.3333
TCGA-CC-A3M9-01	1.24168	0.527417	0.261164	2
TCGA-CC-A3MA-01	0.101731	0.0292448	0	288.333
TCGA-CC-A3MB-01	0.204821	0.0161025	0	228.667
TCGA-CC-A3MC-01	0.138959	0.013586	0	292
TCGA-CC-A5UC-01	0.183755	0.013677	0.00221413	199.333
TCGA-CC-A5UD-01	0.130002	0.0360237	8.11372e-20	237.333
TCGA-CC-A5UE-01	0.157595	0.0289502	0.00804305	170
TCGA-CC-A7IE-01	0.0827688	0.103017	0.0781607	145
TCGA-CC-A7IF-01	0.13644	0	6.24243e-20	307.333
TCGA-CC-A7IG-01	0.0504551	0.00930112	2.982e-19	303
TCGA-CC-A7IH-01	0.131301	0	3.47991e-20	314
TCGA-CC-A7II-01	0.187636	0.0158561	0.000212351	199.667
TCGA-CC-A7IJ-01	0.762442	0.366163	0.149865	6.66667
TCGA-CC-A7IK-01	0.144069	0.00736482	0.00486674	237.333
TCGA-CC-A7IL-01	0.122957	0.00713858	0.00633318	252.667
TCGA-CC-A8HS-01	0.0929383	0	0.00721673	288
TCGA-CC-A8HT-01	0.114194	0.0544633	3.91601e-18	216.667
TCGA-CC-A8HU-01	0.114297	0.0236017	4.4617e-19	258
TCGA-CC-A8HV-01	0.0639757	0.0199666	0	311.667
TCGA-CC-A9FS-01	0.154962	0.0218022	0.00166855	209
TCGA-CC-A9FU-01	0	0.0405808	0.00594417	219
TCGA-CC-A9FV-01	0.531052	0.116243	0.112606	23.3333
TCGA-CC-A9FW-01	0.157533	0.0536981	0.00151293	168
TCGA-DD-A113-01	0.134117	0.0765539	0.016847	149.667
TCGA-DD-A114-01	0.39667	0.413859	0.0465543	25.3333
TCGA-DD-A115-01	0.182517	0.0376371	0	207.333
TCGA-DD-A116-01	0.142974	0.0253381	4.5526e-19	229.333
TCGA-DD-A118-01	0.150153	0	7.64652e-20	291
TCGA-DD-A119-01	0.129706	0.00675817	9.52428e-20	291.667
TCGA-DD-A11A-01	0.177473	0.00928565	0.0019442	213.667
TCGA-DD-A11B-01	0.154574	0	6.04798e-20	287.667
TCGA-DD-A11C-01	0.20054	0.0128636	1.21463e-19	213.333
TCGA-DD-A11D-01	0.165167	0.0187974	1.72182e-19	227.667
TCGA-DD-A1EA-01	0.213508	0.11025	0.0328371	62
TCGA-DD-A1EB-01	0.154842	0.0313599	0.0198773	151
TCGA-DD-A1EC-01	0.93232	0.325087	0.164285	5.66667
TCGA-DD-A1ED-01	0.216066	0.0448254	0.0210365	90
TCGA-DD-A1EE-01	0.15258	0.00557422	0.00290121	242
TCGA-DD-A1EF-01	0.156638	0.0697937	0.0459637	110
TCGA-DD-A1EG-01	0.201312	0.0320217	0.00786769	131.667
TCGA-DD-A1EH-01	0.194567	0.0234198	0.00118504	173
TCGA-DD-A1EI-01	0.211636	0.0283082	0	200.667
TCGA-DD-A1EJ-01	0.116298	0.0248511	0	283.333
TCGA-DD-A1EK-01	0.144601	0.0229608	0	264.667
TCGA-DD-A1EL-01	0.156481	0.0158431	0.0157051	187.333
TCGA-DD-A39V-01	0.211088	0.0608016	0.0396194	75.3333
TCGA-DD-A39W-01	0.172837	0.0325766	0.0197693	134.333
TCGA-DD-A39X-01	0.163472	0.013633	0	264.333
TCGA-DD-A39Y-01	0.102259	0	2.71051e-20	331.667
TCGA-DD-A39Z-01	0.0988886	0.0121619	0.00694469	255
TCGA-DD-A3A1-01	0.150995	0.0264074	0.00572144	189.333
TCGA-DD-A3A2-01	0.136074	0.0102046	0.00454683	240
TCGA-DD-A3A3-01	0.110276	0.0138827	0.00277962	262
TCGA-DD-A3A4-01	0.087627	0	0.00297195	301.667
TCGA-DD-A3A5-01	0.197411	0.0438452	0.000668257	146.333
TCGA-DD-A3A6-01	0.39107	0.0665703	0.0287846	56
TCGA-DD-A3A7-01	0.0990651	0.0295822	0.0135492	209.333
TCGA-DD-A3A8-01	0.145496	0.00742729	4.1352e-19	264.333
TCGA-DD-A3A9-01	0.175214	0.0629189	0.0320769	101.333
TCGA-DD-A4NA-01	0.14717	0.0211856	0.00833456	198
TCGA-DD-A4NB-01	0.304162	0.086157	0.0278821	55.3333
TCGA-DD-A4ND-01	0.288709	0.124033	0.0171322	60
TCGA-DD-A4NE-01	0.142214	0.00393625	2.10439e-18	270.333
TCGA-DD-A4NF-01	0.170598	0	2.93009e-20	272.667
TCGA-DD-A4NG-01	0.156936	0.0229325	0.00871122	180.667
TCGA-DD-A4NH-01	0	0.0187404	0	317
TCGA-DD-A4NI-01	0.212303	0.104584	0.0749761	54
TCGA-DD-A4NJ-01	0.2293	0.0279888	0.00436365	137.667
TCGA-DD-A4NK-01	0.151325	0	0.0064412	247
TCGA-DD-A4NL-01	0.153099	0.0238844	0.00169449	205.667
TCGA-DD-A4NN-01	0.121765	0.00886254	1.35998e-18	277.667
TCGA-DD-A4NO-01	0.144661	0.0381481	0.0131565	162.333
TCGA-DD-A4NP-01	0.138253	0.0105913	1.07841e-21	277.667
TCGA-DD-A4NQ-01	0.160985	0.0155702	0.00242752	213.667
TCGA-DD-A4NR-01	0.536942	0.280434	0.11567	12
TCGA-DD-A4NS-01	0.354645	0.227066	0.0288951	37.3333
TCGA-DD-A4NV-01	0.194917	0.032809	0	200
TCGA-DD-A73A-01	0.207312	0.053732	0.0395824	80.3333
TCGA-DD-A73B-01	0.136778	0.0163712	0.00126746	239
TCGA-DD-A73C-01	0.187018	0.0638966	0.0204715	96.6667
TCGA-DD-A73D-01	0.116713	0.00294822	0.000866345	285
TCGA-DD-A73E-01	0.119333	0.00724074	0	316.667
TCGA-DD-A73F-01	0.38041	0.205621	0.115551	20.3333
TCGA-DD-A73G-01	0.018654	0.00446685	0	341.333
TCGA-DD-AA3A-01	0	0.0155944	0.00517961	262.333
TCGA-DD-AAC8-01	0.130337	0.00462124	0.000534169	275.667
TCGA-DD-AAC9-01	0.13203	0.0282129	0.018289	183.667
TCGA-DD-AACA-01	0.130267	0.00177273	0.0174771	240.333
TCGA-DD-AACB-01	0.315594	0.16118	0.12269	25.3333
TCGA-DD-AACC-01	0.577498	0.290971	0.256821	6.33333
TCGA-DD-AACD-01	0.158865	0.0187835	0.0116486	184.667
TCGA-DD-AACE-01	0.154809	0.0137933	0.0167353	191.333
TCGA-DD-AACF-01	0.163559	0.0214083	0	247
TCGA-DD-AACG-01	0.120282	0.015934	0.00834038	229
TCGA-DD-AACH-01	0.207383	0.00338107	0	249.333
TCGA-DD-AACI-01	0.389194	0.102306	0.113681	30.3333
TCGA-DD-AACJ-01	0.104009	0.0107074	0.00672734	255
TCGA-DD-AACK-01	0.174881	0.0147171	0.0102949	181.667
TCGA-DD-AACL-01	0.193185	0.0621779	0.0140378	102.333
TCGA-DD-AACN-01	0.189707	0.0626578	0	180
TCGA-DD-AACO-01	0.177181	0.0206368	0.0168037	161.333
TCGA-DD-AACP-01	0.131032	0.0265041	0.0188299	186.333
TCGA-DD-AACQ-01	0.107183	0.00896565	2.73106e-19	295.667
TCGA-DD-AACS-01	0.137919	0.00345096	3.07206e-18	274
TCGA-DD-AACT-01	0.179265	0.0705879	0.0197386	104
TCGA-DD-AACU-01	0.186544	0.0493452	0.00200432	145.667
TCGA-DD-AACV-01	0.132614	0	1.2013e-19	304.667
TCGA-DD-AACW-01	0.146158	0.0216607	0.0160063	187
TCGA-DD-AACX-01	0.189547	0.0470937	0.00658906	128.667
TCGA-DD-AACY-01	0.178808	0.0361597	0	209
TCGA-DD-AACZ-01	0.475763	0.0927226	0.0699039	36
TCGA-DD-AAD0-01	0.114028	0.00690717	0.00357939	269
TCGA-DD-AAD1-01	0.259445	0.229475	0.0485226	36.6667
TCGA-DD-AAD2-01	0.187699	0.0369741	0.0045374	144
TCGA-DD-AAD3-01	0.186879	0.0429137	0.000180031	160
TCGA-DD-AAD5-01	0.0771729	0	1.77853e-18	317.667
TCGA-DD-AAD6-01	0.134325	0.00355484	0.0177604	232
TCGA-DD-AAD8-01	0.181044	0.0246131	1.56918e-21	211
TCGA-DD-AADA-01	0.161664	0.0455628	0.0662032	114.333
TCGA-DD-AADB-01	0.232059	0.181861	0.10508	35.3333
TCGA-DD-AADC-01	0.186917	0.025195	0.00857799	150.333
TCGA-DD-AADD-01	0.205789	0.0404597	0.0142888	108.667
TCGA-DD-AADF-01	0.179633	0.0363859	0.0408118	113.333
TCGA-DD-AADG-01	0.166724	0.0212809	3.17631e-19	219.333
TCGA-DD-AADI-01	0.13494	0.0762153	0.0707391	127
TCGA-DD-AADJ-01	0.143126	0.018685	0	274.333
TCGA-DD-AADK-01	0.100093	0.0553661	2.22142e-20	242.333
TCGA-DD-AADL-01	0.164147	0.0667284	3.71344e-19	172.667
TCGA-DD-AADM-01	0.115725	0.0156829	0.00214935	254.667
TCGA-DD-AADN-01	0.418353	0.103306	0.162769	24.3333
TCGA-DD-AADO-01	0.0517121	0.049745	0.097578	162.667
TCGA-DD-AADP-01	0.144068	0.0161278	8.00911e-20	256
TCGA-DD-AADQ-01	0.122032	0.0333375	0.0385087	170.333
TCGA-DD-AADR-01	0.202633	0.0262302	0.0160562	127.333
TCGA-DD-AADS-01	0.218484	0.0371526	0.0996259	75
TCGA-DD-AADU-01	0.178209	0.00139561	0.0059067	216
TCGA-DD-AADV-01	0.17725	0.0339249	1.01447e-18	182
TCGA-DD-AADW-01	0.169887	0	6.46516e-19	258.333
TCGA-DD-AADY-01	0.125044	0.00954624	0	305
TCGA-DD-AAE0-01	0	0.0247992	0	298
TCGA-DD-AAE1-01	0.115063	0.0237356	0	282.667
TCGA-DD-AAE2-01	0.257511	0.0944371	0.0229498	60
TCGA-DD-AAE3-01	0.186581	0.00904974	0	250
TCGA-DD-AAE4-01	0.296954	0.0814732	0.0891674	42.3333
TCGA-DD-AAE6-01	0.104288	0.00158771	4.05407e-19	310
TCGA-DD-AAE7-01	0.193563	0.0310288	0.0257017	114
TCGA-DD-AAE9-01	0.124492	0	0.00110803	289.333
TCGA-DD-AAEA-01	0.206688	0.0789895	0.0615163	65
TCGA-DD-AAEB-01	0.154346	0.0281042	0.0249227	153.333
TCGA-DD-AAED-01	0.06796	0.00239298	0.0119812	270
TCGA-DD-AAEE-01	0.152667	0	0.011176	233.667
TCGA-DD-AAEG-01	0.192882	0.00515029	0	253.333
TCGA-DD-AAEH-01	0.342318	0.155458	0.168632	21.6667
TCGA-DD-AAEI-01	0.171944	0.022847	0.00553696	179
TCGA-DD-AAEK-01	0.276734	0.106132	0.0763074	40.3333
TCGA-DD-AAVP-01	0.13928	0.0227133	2.30916e-20	253.667
TCGA-DD-AAVQ-01	0.228976	0.204206	0.0993227	35.3333
TCGA-DD-AAVR-01	0.234416	0.0608677	0.0518872	62.6667
TCGA-DD-AAVS-01	0.140094	0.0368096	0.0144846	168
TCGA-DD-AAVU-01	0.147564	0	0	306
TCGA-DD-AAVV-01	0.198409	0.0690128	0.00331561	122.667
TCGA-DD-AAVW-01	0.192915	0.0340054	1.92392e-19	175
TCGA-DD-AAVX-01	0.143941	0.0231532	0.0285925	173.333
TCGA-DD-AAVY-01	0.134691	0.014349	0.00332459	240.667
TCGA-DD-AAVZ-01	0.129903	0	1.25206e-19	306.333
TCGA-DD-AAW0-01	0.1862	0.0165785	0.00921394	169
TCGA-DD-AAW1-01	0.143899	0	2.57528e-19	288.667
TCGA-DD-AAW2-01	0.161604	0.0191398	0.000311469	215.667
TCGA-DD-AAW3-01	0.148919	0	0.00386587	254
TCGA-ED-A459-01	0.147747	6.79723e-05	6.29834e-18	268.667
TCGA-ED-A4XI-01	0.202452	0.0863912	0.0167343	86
TCGA-ED-A5KG-01	0.914927	0.64276	0.368249	1.66667
TCGA-ED-A627-01	0.606962	0.272035	0.0952022	14.6667
TCGA-ED-A66X-01	0.193031	0.043035	2.97603e-19	165
TCGA-ED-A66Y-01	0.0571117	0.00656726	6.80607e-20	317
TCGA-ED-A7PX-01	0.152897	0.039796	0	224.667
TCGA-ED-A7PY-01	0.0856317	0.0313441	0	279.667
TCGA-ED-A7PZ-01	0.0995454	0.0093825	0	318.667
TCGA-ED-A7XO-01	0.19168	0.0497674	9.31606e-20	165.667
TCGA-ED-A7XP-01	0.166709	0.0273958	0.00406099	177.667
TCGA-ED-A82E-01	0	0.0233826	0.0140112	229
TCGA-ED-A8O5-01	0.168378	0.0478973	0.00382235	153.667
TCGA-ED-A8O6-01	0.0589918	0.0385275	0.00466665	219.667
TCGA-ED-A97K-01	0.251867	0.0776698	0.00274716	104.333
TCGA-EP-A12J-01	0.109193	0.0211179	0	293.667
TCGA-EP-A26S-01	0.164875	0.0148364	1.19297e-18	224.667
TCGA-EP-A2KA-01	0.220713	0.0962029	0.0785262	50.6667
TCGA-EP-A2KB-01	0.158046	0.0234861	0.0176898	164.667
TCGA-EP-A2KC-01	0.129377	0.0147169	0.00554589	237.667
TCGA-EP-A3JL-01	0.192402	0.0549255	0.0129826	108.333
TCGA-EP-A3RK-01	0.302875	0.107686	0.0675765	39.3333
TCGA-ES-A2HS-01	0.135403	0.00604228	3.29348e-18	272.667
TCGA-ES-A2HT-01	0.10802	0.00323889	6.5589e-19	301.667
TCGA-FV-A23B-01	0.183842	0.03714	0.0120046	130.667
TCGA-FV-A2QQ-01	0.163378	0.0483557	0.0213562	123.667
TCGA-FV-A2QR-01	0.135533	0.0183642	0	278
TCGA-FV-A3I0-01	0.170147	0.0146451	0	249.667
TCGA-FV-A3I1-01	0.14423	0.0259356	0.00752843	190
TCGA-FV-A3R2-01	0.139464	0.0442981	0.0111768	166.333
TCGA-FV-A3R3-01	0.252186	0.0301606	0	179
TCGA-FV-A495-01	0.184317	0.0551524	0	183.333
TCGA-FV-A496-01	0.112349	0.00414998	0.00115614	285.667
TCGA-FV-A4ZP-01	0.177955	0.0246758	0.0302213	136.667
TCGA-FV-A4ZQ-01	0.510365	0.349978	0.200027	7
TCGA-G3-A25S-01	0.173495	0.0143006	0.00533139	195.333
TCGA-G3-A25T-01	0.127596	0.0105191	0	297.667
TCGA-G3-A25U-01	0.149919	0.0158299	0	265.667
TCGA-G3-A25V-01	0.194977	0.0315111	0.0104319	130
TCGA-G3-A25X-01	0.264235	0.130177	0.0158669	63.3333
TCGA-G3-A25Y-01	0.236267	0.0613077	0	152.333
TCGA-G3-A25Z-01	0.160632	0.00962777	0.00115491	228.667
TCGA-G3-A3CG-01	0.154207	0.0216871	0.00869209	188.333
TCGA-G3-A3CH-01	0.205072	0.0437302	0.0049981	125.333
TCGA-G3-A3CI-01	0.201875	0.0535128	0.00999977	109
TCGA-G3-A3CJ-01	0.148746	0.00501432	0	288.667
TCGA-G3-A3CK-01	0.233258	0.106163	0.064113	48
TCGA-G3-A5SI-01	0.126483	0.00797632	0	303.667
TCGA-G3-A5SJ-01	0.301686	0.117826	0.0582107	41.3333
TCGA-G3-A5SK-01	0.225856	0.0303952	0.0403747	94
TCGA-G3-A5SL-01	0.132597	0.0100301	7.80687e-22	286.333
TCGA-G3-A5SM-01	0.184755	0.0213791	0.00525171	173.333
TCGA-G3-A6UC-01	0.137906	0.00393275	0	300.333
TCGA-G3-A7M5-01	0.16295	0.0292559	0.00727856	167.333
TCGA-G3-A7M6-01	0.170041	0.0974488	2.67552e-19	162.333
TCGA-G3-A7M7-01	0.139184	0.00650555	0.00609548	242
TCGA-G3-A7M8-01	0.169764	0.00271839	0	271.667
TCGA-G3-A7M9-01	0.0835099	0.0840855	0.000234696	213
TCGA-G3-AAUZ-01	0.179589	0.0417761	0.0043348	149.667
TCGA-G3-AAV0-01	0.118037	0.0205701	0.00343463	239.667
TCGA-G3-AAV1-01	0.183599	0	0.00931964	207
TCGA-G3-AAV2-01	0.13013	0.000581579	3.98877e-19	295.667
TCGA-G3-AAV3-01	0.291231	0.174867	0.127722	27.3333
TCGA-G3-AAV4-01	0.151963	0	0.00338854	252.333
TCGA-G3-AAV5-01	0.115912	0.0234818	0.0121548	212
TCGA-G3-AAV6-01	0.114311	0.0193591	0.0398076	202
TCGA-G3-AAV7-01	0.135247	0.00827391	2.72126e-18	267.667
TCGA-GJ-A3OU-01	0.403494	0.0197051	0.0200283	110.333
TCGA-GJ-A6C0-01	0.137005	0.00811582	0	291.333
TCGA-GJ-A9DB-01	0.183441	0.0499142	0	185
TCGA-HP-A5MZ-01	0.22555	0.0301944	0.017883	108
TCGA-HP-A5N0-01	0.222931	0.0537227	3.84385e-18	132.667
TCGA-K7-A5RF-01	0.202049	0.0562097	0.00738478	110.333
TCGA-K7-A5RG-01	0.68604	0.547768	0.23578	3.66667
TCGA-K7-A6G5-01	0.171981	0.0256236	0.00772076	163.667
TCGA-K7-AAU7-01	0	0.0234498	0.000999766	260.667
TCGA-KR-A7K0-01	0.186152	0.00317504	0.00181778	221
TCGA-KR-A7K2-01	0.13024	0.0114376	0.00829685	233.333
TCGA-KR-A7K7-01	0.21435	0.0936898	0.0943823	53
TCGA-KR-A7K8-01	0.378632	0.185185	0.0824369	27
TCGA-LG-A6GG-01	0.0724254	0.0025999	0	332.333
TCGA-LG-A9QC-01	0.136516	0.00225893	6.72239e-21	298
TCGA-LG-A9QD-01	0.119202	0.0302142	0.0235111	182.333
TCGA-MI-A75C-01	0.114455	0.016942	0.022242	212.333
TCGA-MI-A75E-01	0.189745	0.0588037	0.00762461	116.333
TCGA-MI-A75G-01	0.15463	0.0055495	0	278.333
TCGA-MI-A75H-01	0.218196	0.0563688	0.011807	94.6667
TCGA-MI-A75I-01	0.13258	0.0492828	0.00510171	185
TCGA-MR-A520-01	0.177386	0.0143466	0.00677342	188
TCGA-MR-A8JO-01	0.240172	0.0583467	0.0474276	63
TCGA-NI-A4U2-01	0.162739	0.000277527	6.82852e-20	269.667
TCGA-NI-A8LF-01	0.179845	0.00601018	0.00322178	216
TCGA-O8-A75V-01	0.16196	0.0784063	0.0234878	110.667
TCGA-PD-A5DF-01	0.191231	0.00671713	7.73186e-22	240.667
TCGA-QA-A7B7-01	0.156699	0.0545393	1.86105e-18	178.667
TCGA-RC-A6M3-01	0	0.0685268	0	251
TCGA-RC-A6M4-01	0.119624	0	0.000618798	291.333
TCGA-RC-A6M5-01	0.175146	0	0	272
TCGA-RC-A6M6-01	0.102605	0.0248568	0.0114069	218
TCGA-RC-A7S9-01	0.150088	0.0241853	0.0165115	175.667
TCGA-RC-A7SB-01	0.143225	0	0	301.333
TCGA-RC-A7SF-01	0.140845	0.036898	0.00860273	175.333
TCGA-RC-A7SH-01	0.111136	0.0199144	1.77018e-19	275.667
TCGA-RC-A7SK-01	0.135831	0.0321499	0.00130273	210.333
TCGA-RG-A7D4-01	0.308335	0.193797	0.131753	23
TCGA-T1-A6J8-01	0.143911	0.018226	0	264
TCGA-UB-A7MA-01	0.154258	0.0459832	7.3499e-19	190.333
TCGA-UB-A7MB-01	0.157234	0.0147488	0	253.333
TCGA-UB-A7MC-01	0.143265	0.0103268	6.10058e-20	270.333
TCGA-UB-A7MD-01	0.194345	0.0249222	4.43004e-19	183.667
TCGA-UB-A7ME-01	0.217626	0.105327	0.0654655	53.6667
TCGA-UB-A7MF-01	0.399306	0.140027	0.135531	21.3333
TCGA-UB-AA0U-01	0.174916	0.0351605	5.88276e-19	184
TCGA-UB-AA0V-01	0.200472	0.0264386	9.51711e-20	186.333
TCGA-WJ-A86L-01	0.120236	0.00813683	0	301.667
TCGA-WQ-A9G7-01	0	0.0102708	0	315.667
TCGA-WQ-AB4B-01	0.142056	0.00551481	0.00394956	249
TCGA-WX-AA44-01	0.112692	0.0216605	0.00036813	255.667
TCGA-WX-AA46-01	0.166881	0.00840479	0	256.667
TCGA-WX-AA47-01	0.119776	0.000246216	0.0017827	283.333
TCGA-XR-A8TC-01	0.104851	0	0	328
TCGA-XR-A8TD-01	0.492606	0.242679	0.0836974	18.6667
TCGA-XR-A8TE-01	0.166901	0.00682967	0.00675305	209.333
TCGA-XR-A8TF-01	0.152173	0.036724	0.0197424	149
TCGA-XR-A8TG-01	0.187939	0.00858101	0	238
TCGA-YA-A8S7-01	0.202066	0.0438659	0.000141167	147.333
TCGA-ZP-A9CV-01	0.214494	0.0227289	0.0236125	120.333
TCGA-ZP-A9CY-01	0.152608	0.0124539	0.000865847	234.333
TCGA-ZP-A9CZ-01	0.221684	0.0773397	0.0199711	73.6667
TCGA-ZP-A9D0-01	0.116232	0	1.35525e-20	317.333
TCGA-ZP-A9D1-01	0.163904	0.051422	0.00648438	145.667
TCGA-ZP-A9D2-01	0.203942	0.0360219	0.00335429	139.667
TCGA-ZP-A9D4-01	0.145903	0	6.05646e-19	276.667
TCGA-ZS-A9CD-01	0.162347	0.0294848	1.22271e-20	216.667
TCGA-ZS-A9CE-01	0.132287	0.00144095	5.0377e-19	289.667
TCGA-ZS-A9CF-01	0.22008	0.0219254	0.0171245	127.667
TCGA-ZS-A9CG-01	0.171186	0.0222557	0	226.333
